# Supplementary material
Source: PubMed Central journal article supplement (PMC7450121)
Supplement: supp_RA120.014464_160990_2_supp_550359_qc3f95.pdf [file supp_RA120.014464_160990_2_supp_550359_qc3f95.pdf]

## PRL3 pseudophosphatase activity is necessary and sufficient to promote metastatic growth

Guennadi Kozlov<sup>1,¶</sup>, Yosuke Funato<sup>2,¶</sup>, Yu Seby Chen<sup>1</sup>, Zhidian Zhang<sup>1</sup>, Katalin Illes<sup>1</sup>, Hiroaki Miki<sup>2</sup> & Kalle Gehring<sup>1,\*</sup>

<sup>1</sup>Department of Biochemistry and Centre de Recherche en Biologie Structurale, McGill University, Montreal, Quebec, Canada.

<sup>2</sup>Department of Cellular Regulation, Research Institute for Microbial Diseases, Osaka University, Suita, Osaka, Japan.

Table S1: Data Collection and Refinement Statistics

|                                                     | PRL2 C101D/CBS        | PRL1 C104D/CBS        |
|-----------------------------------------------------|-----------------------|-----------------------|
| <b>Data collection</b>                              |                       |                       |
| Space group                                         | I222                  | I222                  |
| Cell dimensions                                     |                       |                       |
| <i>a</i> , <i>b</i> , <i>c</i> (Å)                  | 56.86, 124.54, 153.41 | 52.14, 127.94, 152.16 |
| Resolution (Å)                                      | 50-2.90 (2.95-2.90)   | 50-2.75 (2.80-2.75)   |
| <i>R</i> <sub>sym</sub>                             | 0.074 (0.592)         | 0.069 (0.549)         |
| <i>I</i> / $\sigma$ <i>I</i>                        | 13.0 (1.2)            | 24.6 (1.6)            |
| Completeness (%)                                    | 93.7 (93.2)           | 99.8 (99.1)           |
| Redundancy                                          | 2.9 (2.9)             | 5.0 (5.1)             |
| <b>Refinement</b>                                   |                       |                       |
| Resolution (Å)                                      | 24.2 - 2.88           | 41.1 - 2.76           |
| No. reflections                                     | 11721                 | 12756                 |
| <i>R</i> <sub>work</sub> / <i>R</i> <sub>free</sub> | 0.238/0.295           | 0.240/0.281           |
| No. atoms                                           |                       |                       |
| Protein                                             | 2237                  | 2306                  |
| Water                                               | 4                     | 9                     |
| Nucleotide                                          |                       |                       |
| <i>B</i> -factors                                   |                       |                       |
| Protein                                             | 106.6                 | 88.7                  |
| Water                                               | 79.4                  | 73.0                  |
| Nucleotide                                          |                       |                       |
| R.m.s deviations                                    |                       |                       |
| Bond lengths (Å)                                    | 0.005                 | 0.006                 |
| Bond angles (°)                                     | 0.75                  | 0.82                  |
| Ramachandran statistics (%)                         |                       |                       |
| Most favored regions                                | 92.7                  | 96.3                  |
| Additional allowed regions                          | 7.3                   | 3.4                   |
| Disallowed regions                                  | 0.0                   | 0.3                   |

<sup>1</sup>Highest resolution shell is shown in parentheses.

# Supplemental Material

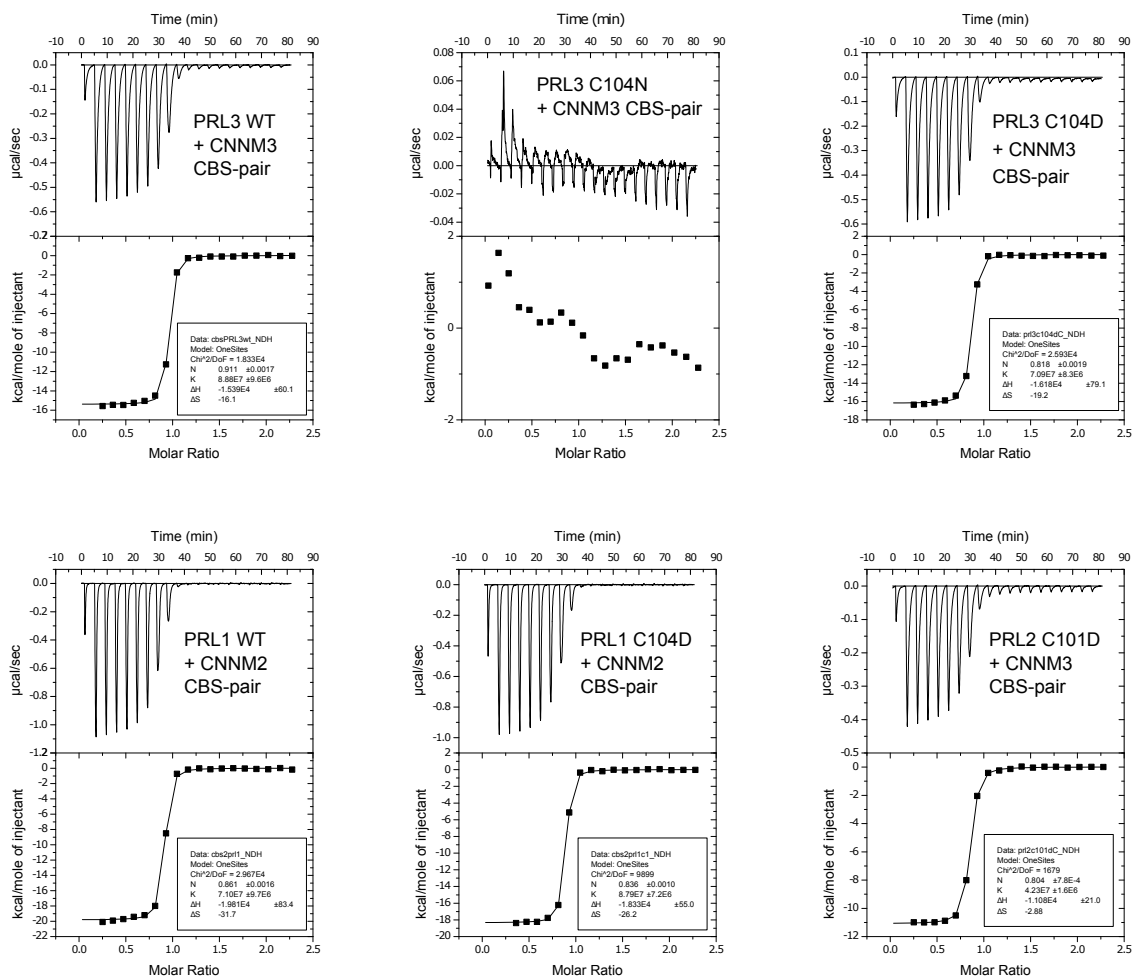

## Supplemental Figure S1. Isothermal titration curves.

ITC thermograms of PRL binding to CNNM CBS-pair GST fusion proteins.

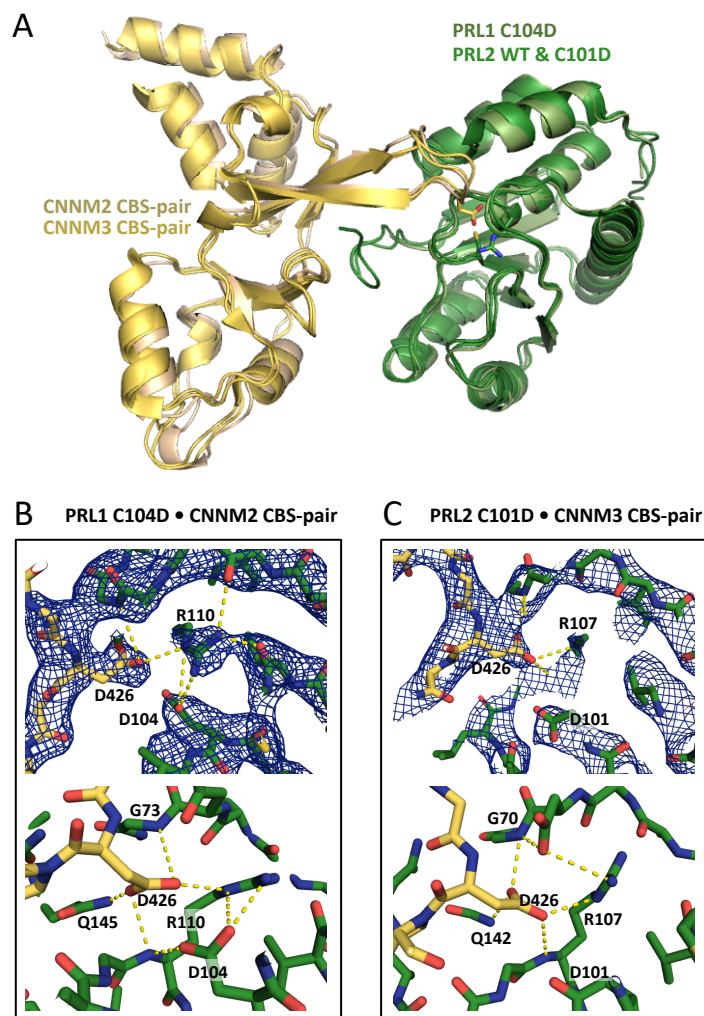

**Supplemental Figure S2. Comparison of mutant and wild-type structures.** (A) Overlay of three crystal structures: PRL1 C104D with CNNM2 CBS-pair domain, PRL2 C101D with CNNM3 CBS-pair domain, and wild-type PRL2 with CNNM3 CBS-pair domain. Key residues for the interaction, CNNM aspartic acid 426, PRL2 cysteine 101 and arginine 107, are shown in stick form. (B & C) Electron density maps (top) and polar contacts (bottom) in the PRL1 C104D and PRL2 C104D complexes.

## Supplemental Material

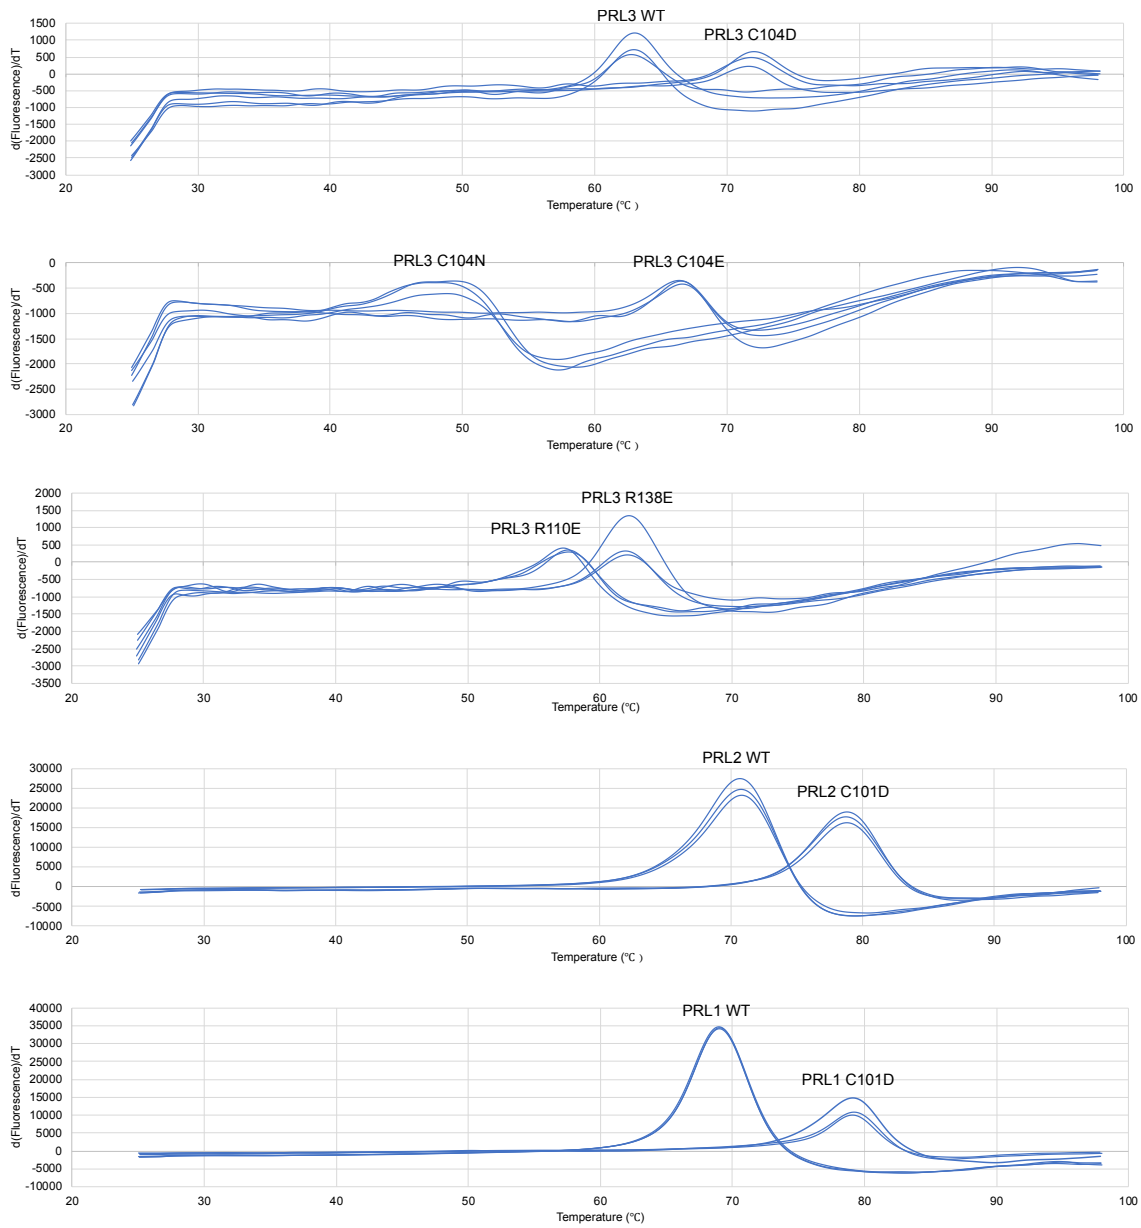

**Supplemental Figure S3. Differential scanning fluorimetry measurements of PRL stability.**
